# Supplementary material
Source: publisher site journal article supplement (https://www.dovepress.com/article/254150)
Supplement: Supplementary file 1 [file get_supplementary_file.php]

## Contents

**1. Supplement 1 Diagnostic criteria for postoperative adverse events.....2**

**2. Supplement 2 Postoperative pulmonary complications score .....4**

# Supplement 1 Diagnostic criteria for postoperative adverse events

## **New-onset atrial fibrillation**

New-onset atrial fibrillation was defined both electro-physiologically and clinically as recommended by the American Association for Thoracic Surgery: Electrocardiograms(ECG) recordings which demonstrate characteristics atrial fibrillation findings for at least 30 seconds or for the entirety of the ECG if shorter than 30 seconds; clinically significant atrial fibrillation which requires treatment with heart beat rate or rhythm control agents, anticoagulants or increases hospital stay.

Whether the ECG recording indicated new-onset atrial fibrillation was determined by a cardiologist.

## **Blood transfusion**

The patient receives blood transfusion (including blood component transfusion) after transferred to the ICU ward or general ward.

## **Abdominal distention**

Patients feel bloated, and needs medication.

## **Constipation**

The patient has difficulty defecating or does not defecate for three days or needs medication to defecate.

## **Acute kidney injury**

Meet any of the following conditions

Serum creatinine concentration level is found to be  $\geq 50\%$  increased from baseline within 7days.

Serum creatinine concentration level increase of at least 0.3mg/dl (426.5mmol/l) within 48 hours.

Urine volume of less than 0.5ml/kg/h for 6 hours

## **Vomiting**

Patient vomiting gastric contents

## **Nausea**

Patients feel nauseous and needs medication.

## **Headache**

The patients have a headache (whether medication is needed or not).

## **insomnia**

Patient complains of insomnia, or reduction nightly sleep time (whether medication is needed or not).

## **Heart failure**

Clinical manifestations: dyspnea, cough with pink foamy sputum, etc.

Cardiogenic shock: Hypotension (Systolic blood pressure<90mmHg) occurs with sufficient blood volume,

accompanied by tissue hypoperfusion

Plasma level of brain natriuretic peptides (BNP) Increased.

### **Nightmare**

Patient self-complaint that the incidence of nightmares is higher than before surgery.

### **Incision infection**

Infection in surgical incision or incision at drainage tube.

### **ICU re-entry**

As described above.

### **Ventricular fibrillation**

Electrocardiograms (ECG) recordings which demonstrate characteristics Ventricular fibrillation findings

Whether the ECG recording indicated ventricular fibrillation was determined by a cardiologist.

## Supplement 2 Postoperative pulmonary complications score

| Postoperative pulmonary complications score                                       |                                                                                                                                                                                                                                                                                                                                                                                                                                                                                                                                                                                                                                                                                                                                                                                                                                               |
|-----------------------------------------------------------------------------------|-----------------------------------------------------------------------------------------------------------------------------------------------------------------------------------------------------------------------------------------------------------------------------------------------------------------------------------------------------------------------------------------------------------------------------------------------------------------------------------------------------------------------------------------------------------------------------------------------------------------------------------------------------------------------------------------------------------------------------------------------------------------------------------------------------------------------------------------------|
| Grade 1                                                                           | <p>Cough, dry</p> <p>Microatelectasis: abnormal lung findings and temperature <math>&gt; 37.5^{\circ}\text{C}</math> without other documented cause; normal chest radiograph</p> <p>Dyspnea, not due to other documented cause</p>                                                                                                                                                                                                                                                                                                                                                                                                                                                                                                                                                                                                            |
| Grade 2                                                                           | <p>Cough, productive, not due to other documented cause</p> <p>Bronchospasm: new wheezing or pre-existent wheezing resulting in a change in therapy</p> <p>Hypoxemia (<math>\text{SpO}_2 \leq 90\%</math>) at room air</p> <p>Atelectasis: gross radiological confirmation (concordance of 2 independent experts) plus either temperature <math>&gt; 37.5^{\circ}\text{C}</math> or abnormal lung findings</p> <p>Hypercarbia (<math>\text{PaCO}_2 &gt; 50 \text{ mmHg}</math>), requiring treatment</p>                                                                                                                                                                                                                                                                                                                                      |
| Grade 3                                                                           | <p>Pleural effusion, resulting in thoracentesis</p> <p>Pneumonia: radiological evidence (concordance of 2 independent experts) plus clinical symptoms (two of the following: leucocytosis or leucopenia, abnormal temperature, purulent secretions), plus either a pathological organism (by Gram stain or culture), or a required change in antibiotics</p> <p>Pneumothorax</p> <p>Noninvasive ventilation, strictly applied to those with all of the following: a) oxygen saturation (<math>\text{SpO}_2</math>) lower than 92% under supplemental oxygen; b) need of supplemental oxygen <math>&gt; 5 \text{ L/min}</math>; and <math>\text{RR} \geq 30 \text{ bpm}</math></p> <p>Re-intubation postoperative or intubation, period of ventilator dependence (non-invasive or invasive ventilation) <math>\leq 48 \text{ hours}</math></p> |
| Grade 4                                                                           | <p>Ventilatory failure: postoperative ventilator dependence exceeding 48 hours, or reintubation with subsequent period of ventilator dependence exceeding 48 hours</p>                                                                                                                                                                                                                                                                                                                                                                                                                                                                                                                                                                                                                                                                        |
| Grade 5                                                                           | <p>Death before hospital discharge</p>                                                                                                                                                                                                                                                                                                                                                                                                                                                                                                                                                                                                                                                                                                                                                                                                        |
| * We only classified as grade 2 if two or more items in the grade 2 were present. |                                                                                                                                                                                                                                                                                                                                                                                                                                                                                                                                                                                                                                                                                                                                                                                                                                               |
